# Supplementary material for: Codesign approaches involving older adults in the development of electronic healthcare tools: a systematic review
Source: HighWire-hosted journal article supplement (doi:10.1136/bmjopen-2021-058390), 2022-07-01
Supplement: bmjopen-2021-058390supp001_data_supplement.pdf [file bmjopen-2021-058390supp001_data_supplement.pdf]

## Supplementary Appendix A - Search Results

| PubMed – 3.17.2021 |                                                                                                                                                                                                                                                                                                                                                                                                                                                           |           |
|--------------------|-----------------------------------------------------------------------------------------------------------------------------------------------------------------------------------------------------------------------------------------------------------------------------------------------------------------------------------------------------------------------------------------------------------------------------------------------------------|-----------|
| Search #           | Query                                                                                                                                                                                                                                                                                                                                                                                                                                                     | Results   |
| #1                 | (Co-Design[tiab] OR Co-Creation[tiab] OR Co-Production[tiab] OR Participatory Design[tiab] OR Human Factors[tiab] OR User-Centered Design[mesh] OR User-Centered Design[tiab] OR Participatory Approach[tiab] OR Human-Centered Design[tiab] OR Universal design[mesh] OR Patient Participation[mesh] OR patient participation[tiab])                                                                                                                     | 38,538    |
| #2                 | (Aged[mesh] OR Older Adults[tiab] OR Older People[tiab] OR Elderly[tiab] OR Geriatric[tiab] OR Aged over 60[tiab] OR aged 60[tiab] OR Seniors[tiab] OR Over 65[tiab])                                                                                                                                                                                                                                                                                     | 3,333,143 |
| #3                 | (Electronic Health Records[mesh] OR Electronic Health Records[tiab] OR Electronic Health Record[tiab] OR Electronic Healthcare[tiab] OR eHealth[tiab] OR “mHealth”[tiab] OR Decision Aid[tiab] OR decision aids[tiab] OR Electronic Healthcare Aid[tiab] OR Healthcare Application[tiab] OR digital health[tiab] OR health information technology[tiab] OR health information technologies[tiab] OR health technology[tiab] OR health technologies[tiab]) | 59,271    |
| #4                 | #1 AND #2 AND #3                                                                                                                                                                                                                                                                                                                                                                                                                                          | 495       |

| Embase – 3.17.2021 |                                                                                                                                                                                                                                                                                                                                                                                                                                                                                                    |           |
|--------------------|----------------------------------------------------------------------------------------------------------------------------------------------------------------------------------------------------------------------------------------------------------------------------------------------------------------------------------------------------------------------------------------------------------------------------------------------------------------------------------------------------|-----------|
| Search #           | Query                                                                                                                                                                                                                                                                                                                                                                                                                                                                                              | Results   |
| #1                 | ('human factors research'/exp OR 'user-centered design'/exp OR 'Universal design'/exp OR 'Patient Participation'/exp OR ('co-design' OR 'Co-Creation' OR 'Co-Production' OR 'Participatory Design' OR 'Human Factors' OR 'user-centered design' OR 'Participatory Approach' OR 'Human-Centered Design' OR 'patient participation'):ab,ti)                                                                                                                                                          | 42,464    |
| #2                 | ('aged'/exp OR ('older adult' OR 'older adults' OR 'older people' OR elderly OR geriatric OR geriatrics OR 'aged over 60' OR 'aged 60' OR 'over 60' OR 'aged over 65' OR 'aged 65' OR 'over 65' OR senior OR seniors):ab,ti)                                                                                                                                                                                                                                                                       | 3,460,578 |
| #3                 | ('electronic health record'/exp OR ('electronic health record' OR 'electronic health records' OR 'electronic healthcare' OR 'ehealth' OR 'mhealth' OR 'electronic decision aid' OR 'electronic decision aids' OR 'electronic healthcare aid' OR 'electronic healthcare aids' OR 'healthcare applications' OR 'Decision Aid' OR 'decision aids' OR 'digital health' OR 'health information technology' OR 'health information technologies' OR 'health technology' OR 'health technologies'):ab,ti) | 59,924    |
| #4                 | #1 AND #2 AND #3                                                                                                                                                                                                                                                                                                                                                                                                                                                                                   | 246       |

| Scopus – 3.17.2021 |                                                                                                                                                                                                                     |         |
|--------------------|---------------------------------------------------------------------------------------------------------------------------------------------------------------------------------------------------------------------|---------|
| Search #           | Query                                                                                                                                                                                                               | Results |
| #1                 | TITLE-ABS("co-design" OR "Co-Creation" OR "Co-Production" OR "Participatory Design" OR "Human Factors" OR "user-centered design" OR "Participatory Approach" OR "Human-Centered Design" OR "patient participation") | 78,052  |
| #2                 | TITLE-ABS("older adult" OR "older adults" OR "older people" OR elderly OR geriatric OR geriatrics OR "aged over 60" OR "aged 60" OR "over 60" OR "aged over 65" OR "aged 65" OR "over 65" OR senior OR seniors)     | 657,056 |

|    |                                                                                                                                                                                                                                                                                                                                                                                                                                                                   |        |
|----|-------------------------------------------------------------------------------------------------------------------------------------------------------------------------------------------------------------------------------------------------------------------------------------------------------------------------------------------------------------------------------------------------------------------------------------------------------------------|--------|
| #3 | TITLE-ABS("electronic health record" OR "electronic health records" OR "electronic healthcare" OR "ehealth" OR "mhealth" OR "electronic decision aid" OR "electronic decision aids" OR "electronic healthcare aid" OR "electronic healthcare aids" OR "healthcare applications" OR "Decision Aid" OR "decision aids" OR "digital health" OR "health information technology" OR "health information technologies" OR "health technology" OR "health technologies") | 54,356 |
| #4 | #1 AND #2 AND #3                                                                                                                                                                                                                                                                                                                                                                                                                                                  | 94     |

- records before duplicates removed: 835
- records after duplicates removed: 625

*Supplementary Appendix B - Study Classification Methods*

| <b>Category</b>                    | <b>Variable</b>                         | <b>Classification method</b>                            |
|------------------------------------|-----------------------------------------|---------------------------------------------------------|
| <b>Summary characteristics</b>     | Year of publication                     | Metadata                                                |
|                                    | First author's geolocation              | Metadata                                                |
|                                    | Study setting                           | Metadata                                                |
|                                    | Number of stakeholders                  | Metadata, mean                                          |
|                                    | Number of older adults                  | Metadata, mean                                          |
|                                    | Study population                        | Metadata                                                |
| <b>Co-design approaches</b>        | Terminology or definitions              | Manual, binary                                          |
|                                    | Theoretical framework/design principles | Manual, binary                                          |
|                                    | Iterative development                   | Metadata, mean                                          |
| <b>Stakeholder involvement</b>     | Participant types                       | Metadata                                                |
|                                    | Types of Involvement Processes          | Leinonen et.al [24]                                     |
|                                    | Learning Levels                         | Bateson [25], Argyris [26]                              |
|                                    | Levels of participation                 | Vaughn et.al [3]                                        |
| <b>Electronic healthcare tools</b> | Types of healthcare tools               | WHO classification of digital health interventions [17] |
|                                    | User testing                            | Metadata                                                |

## Supplementary Appendix C

| Author         | Theoretical Framework/Co-Design Principle                                                                         | Level of Involvement | Involvement Processes |   |   |   |   |   |   |   |   |   |   |   |   |   |   |   |   | User Testing Measures and Validation                 |                         |                                                                          |                                   |                            |           |   |
|----------------|-------------------------------------------------------------------------------------------------------------------|----------------------|-----------------------|---|---|---|---|---|---|---|---|---|---|---|---|---|---|---|---|------------------------------------------------------|-------------------------|--------------------------------------------------------------------------|-----------------------------------|----------------------------|-----------|---|
|                |                                                                                                                   |                      | A                     | B | C | D | E | F | G | H | I | J | K | L | M | N | O | P | Q | Endpoint                                             | Other                   | Objective Measure                                                        | Subjective Measure                | Physiological              | Validated |   |
| Abujarad [52]  | User Centered Design Approach                                                                                     | Empower              |                       |   |   |   |   |   |   |   |   |   |   |   |   |   |   |   |   | confidence and computer efficacy                     |                         |                                                                          | CES                               |                            | X         |   |
|                |                                                                                                                   |                      | X                     | X | X | X | X |   |   | X |   |   |   |   | X | X |   |   |   |                                                      | emotional reactions     |                                                                          |                                   | I-PANAS-SF                 |           | X |
|                |                                                                                                                   |                      |                       |   |   |   |   |   |   |   |   |   |   |   |   |   |   |   |   |                                                      | usability               |                                                                          |                                   | SUS                        |           | X |
| Ahmed [34]     | Participatory Design Approach<br>Developed recommendations for framework                                          | Empower              |                       |   |   |   |   |   |   |   |   |   |   |   |   |   |   |   |   | health literacy                                      |                         |                                                                          | NVS                               |                            | X         |   |
|                |                                                                                                                   |                      | X                     | X |   |   |   |   | X |   |   | X | X |   |   | X |   |   |   | patient engagement - self report on health behaviors |                         |                                                                          | ACE (Altarum Consumer Engagement) |                            | X         |   |
|                |                                                                                                                   |                      |                       |   |   |   |   |   |   |   |   |   |   |   |   |   |   |   |   |                                                      | quality of decision aid |                                                                          |                                   | Ottawa Acceptability Scale |           | X |
| Bogza [29]     | Center for eHealth and Wellbeing Research guidelines<br>Inductive thematic qualitative analysis approach<br>IPDAS | Empower              |                       |   |   |   |   |   |   |   |   |   |   |   |   |   |   |   |   | satisfaction                                         |                         |                                                                          | Likart - unspecified              |                            |           |   |
|                |                                                                                                                   |                      |                       |   | X | X | X |   |   |   |   |   |   |   | X | X |   |   |   |                                                      | usability               |                                                                          |                                   | SUS                        |           | X |
|                |                                                                                                                   |                      |                       |   |   |   |   |   |   |   |   |   |   |   |   |   |   |   |   |                                                      | Comprehension           | teach back method                                                        |                                   | Decisional Conflict Scale  |           | X |
|                |                                                                                                                   |                      |                       |   |   |   |   |   |   |   |   |   |   |   |   |   |   |   |   |                                                      |                         |                                                                          |                                   |                            |           |   |
| Cornet [12]    | User Centered Design<br>Developed recommendations for framework                                                   | Involve              |                       |   |   |   |   |   |   |   |   |   |   |   |   |   |   |   |   | cognitive workload                                   |                         |                                                                          | NASA-TLX                          |                            | X         |   |
|                |                                                                                                                   |                      |                       | X | X | X | X |   |   | X | X |   |   | X |   | X | X |   |   |                                                      | health literacy         |                                                                          |                                   | NVS                        |           | X |
|                |                                                                                                                   |                      |                       |   |   |   |   |   |   |   |   |   |   |   |   |   |   |   |   |                                                      | usability               |                                                                          |                                   | SUS                        |           | X |
|                |                                                                                                                   |                      |                       |   |   |   |   |   |   |   |   |   |   |   |   |   |   |   |   |                                                      | user acceptance         |                                                                          |                                   | Likart - unspecified       |           |   |
| Gonzalez [33]  | none                                                                                                              | Involve              |                       |   |   |   |   |   |   |   |   |   |   |   |   |   |   |   |   | errors                                               |                         | Not stated                                                               |                                   |                            |           |   |
|                |                                                                                                                   |                      |                       |   |   |   |   |   |   |   |   |   |   |   |   |   |   |   |   |                                                      | appearance              |                                                                          |                                   | Likart - unspecified       |           |   |
|                |                                                                                                                   |                      |                       |   |   |   |   |   |   |   |   |   |   |   |   |   |   |   |   |                                                      | comfort                 |                                                                          |                                   | Likart - unspecified       |           |   |
|                |                                                                                                                   |                      |                       |   | X |   |   |   |   |   |   |   |   |   |   |   |   |   |   |                                                      | functionality           |                                                                          |                                   | Likart - unspecified       |           |   |
|                |                                                                                                                   |                      |                       |   |   |   |   |   |   |   |   |   |   |   |   |   |   |   |   |                                                      | reliability             |                                                                          |                                   | Likart - unspecified       |           |   |
| Grimaldi [11]  | Human computer design approach ISO 13407:1999 [ 1 ] revised by ISO 9241-210:2010                                  | Collaborate          |                       |   |   |   |   |   |   |   |   |   |   |   |   |   |   |   |   | usability                                            |                         |                                                                          | Likart - unspecified              |                            |           |   |
|                |                                                                                                                   |                      |                       | X | X | X | X |   |   | X |   |   | X |   | X |   |   |   |   | quality of interaction                               |                         |                                                                          | Us.E 2.0                          |                            |           |   |
|                |                                                                                                                   |                      |                       |   |   |   |   |   |   |   |   |   |   |   |   |   |   |   |   |                                                      | satisfaction            |                                                                          |                                   | Likart - unspecified       |           |   |
| Gustafson [14] | NIATx model as a framework<br>Developed recommendations for framework                                             | Empower              |                       |   |   |   |   |   |   |   |   |   |   |   |   |   |   |   |   | errors                                               |                         | Not stated                                                               |                                   |                            |           |   |
|                |                                                                                                                   |                      | X                     |   | X | X |   |   | X |   |   | X |   |   | X | X |   |   |   |                                                      | usability               | Spending time teaching older adults how to use technology in a classroom |                                   | Likart - unspecified       |           |   |

|                     |                                                                                                     |         |  |  |  |  |  |  |  |  |  |  |  |  |  |  |  |                                                                         |                      |                                     |  |  |                            |   |
|---------------------|-----------------------------------------------------------------------------------------------------|---------|--|--|--|--|--|--|--|--|--|--|--|--|--|--|--|-------------------------------------------------------------------------|----------------------|-------------------------------------|--|--|----------------------------|---|
|                     |                                                                                                     |         |  |  |  |  |  |  |  |  |  |  |  |  |  |  |  | setting                                                                 |                      |                                     |  |  |                            |   |
| Harrington [9]      | Experience-based co-design<br>Developed recommendations for framework                               | Empower |  |  |  |  |  |  |  |  |  |  |  |  |  |  |  | usability                                                               |                      |                                     |  |  | Likart - unspecified       |   |
|                     |                                                                                                     |         |  |  |  |  |  |  |  |  |  |  |  |  |  |  |  | usefulness                                                              | Likart - unspecified |                                     |  |  |                            |   |
| Harte [7]           | HCD methodology ISO 9241-210 standards                                                              | Empower |  |  |  |  |  |  |  |  |  |  |  |  |  |  |  | cognitive workload                                                      |                      |                                     |  |  | NASA-TLX                   | X |
|                     |                                                                                                     |         |  |  |  |  |  |  |  |  |  |  |  |  |  |  |  | efficiency                                                              |                      |                                     |  |  | ASQ                        | X |
|                     |                                                                                                     |         |  |  |  |  |  |  |  |  |  |  |  |  |  |  |  | satisfaction                                                            |                      |                                     |  |  | Likart - unspecified       |   |
|                     |                                                                                                     |         |  |  |  |  |  |  |  |  |  |  |  |  |  |  |  | usability                                                               |                      |                                     |  |  | SUS                        | X |
|                     |                                                                                                     |         |  |  |  |  |  |  |  |  |  |  |  |  |  |  |  | errors                                                                  |                      | Mistakes Counted                    |  |  |                            |   |
|                     |                                                                                                     |         |  |  |  |  |  |  |  |  |  |  |  |  |  |  |  | Performance                                                             |                      | Time to Complete                    |  |  |                            |   |
| Hoffman [39]        | IPDAS<br>Ottawa Decision Support                                                                    | Empower |  |  |  |  |  |  |  |  |  |  |  |  |  |  |  | quality of decision aid                                                 |                      |                                     |  |  | Ottawa Acceptability Scale | X |
|                     |                                                                                                     |         |  |  |  |  |  |  |  |  |  |  |  |  |  |  |  | values clarity                                                          |                      |                                     |  |  | SURE                       | X |
|                     |                                                                                                     |         |  |  |  |  |  |  |  |  |  |  |  |  |  |  |  | errors                                                                  |                      | Observed errors                     |  |  |                            |   |
| Holden [53]         | Age-Related Research-Based Usability Guidelines<br>Principles and Creative Human Factors Approaches | Empower |  |  |  |  |  |  |  |  |  |  |  |  |  |  |  | usability                                                               |                      |                                     |  |  | SUS                        | X |
|                     |                                                                                                     |         |  |  |  |  |  |  |  |  |  |  |  |  |  |  |  | errors                                                                  |                      | Mistakes Counted                    |  |  |                            |   |
|                     |                                                                                                     |         |  |  |  |  |  |  |  |  |  |  |  |  |  |  |  | need for assistance                                                     |                      | Times Request Assistance            |  |  |                            |   |
|                     |                                                                                                     |         |  |  |  |  |  |  |  |  |  |  |  |  |  |  |  | Performance                                                             |                      | Time to Complete                    |  |  |                            |   |
| Kim [38]            | Grounded theory approach                                                                            | Involve |  |  |  |  |  |  |  |  |  |  |  |  |  |  |  |                                                                         |                      |                                     |  |  |                            |   |
| Mansson [35]        | Karagianni's Optimized Honeycomb model                                                              | Empower |  |  |  |  |  |  |  |  |  |  |  |  |  |  |  | findable, accessible, usable, desirable, credible, useful, and valuable |                      | LUX Honeycomb Model ALL QUALITATIVE |  |  |                            |   |
| Martin-Hammond [36] | Nielsen's Heuristics                                                                                | Involve |  |  |  |  |  |  |  |  |  |  |  |  |  |  |  | usability                                                               | qualitative          |                                     |  |  |                            |   |
| Nguyen [42]         | Medical Research Council framework<br>Developed recommendations for framework                       | Empower |  |  |  |  |  |  |  |  |  |  |  |  |  |  |  | satisfaction                                                            |                      |                                     |  |  | Likart - unspecified       |   |
|                     |                                                                                                     |         |  |  |  |  |  |  |  |  |  |  |  |  |  |  |  | errors                                                                  |                      | Observed errors                     |  |  |                            |   |
|                     |                                                                                                     |         |  |  |  |  |  |  |  |  |  |  |  |  |  |  |  | Navigation                                                              | Google Analytics     |                                     |  |  |                            |   |
| Nielsen [44]        | HCD International Organization for Standardization (ISO) standards for human-centered design for    | Empower |  |  |  |  |  |  |  |  |  |  |  |  |  |  |  | usability                                                               |                      |                                     |  |  | Likart - unspecified       |   |





## Supplementary Appendix D

| <b>Co-Design Approach</b>           | <b>Inform</b> |                           | <b>Consult</b> |                           | <b>Involve</b> |                           | <b>Collaborate</b> |                  | <b>Empower</b> |                     |
|-------------------------------------|---------------|---------------------------|----------------|---------------------------|----------------|---------------------------|--------------------|------------------|----------------|---------------------|
|                                     | n             | ref                       | n              | ref                       | n              | ref                       | n                  | ref              | n              | ref                 |
| Co-creation (n=2)                   | 2             | [35,41]                   | 2              | [35,41]                   | 2              | [35,41]                   | 2                  | [35,41]          | 2              | [35,41]             |
| Co-design (n=5)                     | 5             | [8,9,39,42,44]            | 5              | [8,9,39,42,44]            | 5              | [8,9,39,42,44]            | 5                  | [8,9,39,42,44]   | 5              | [8,9,39,42,44]      |
| Human centered computing (n=1)      | 1             | [9]                       | 1              | [9]                       | 1              | [9]                       | 1                  | [9]              | 1              | [9]                 |
| Human Centered Design (HCD) (n=3)   | 3             | [7,11,40]                 | 3              | [7,11,40]                 | 3              | [7,11,40]                 | 2                  | [7,11]           | 1              | [7]                 |
| Human Factors (n=1)                 | 1             | [33]                      | 1              | [33]                      | 1              | [33]                      | 0                  |                  | 0              |                     |
| Interaction Design Process (n=1)    | 1             | [9]                       | 1              | [9]                       | 1              | [9]                       | 1                  | [9]              | 1              | [9]                 |
| Participatory Design (n=7)          | 7             | [8,9,34,37,38,44,55]      | 7              | [8,9,34,37,38,44,55]      | 7              | [8,9,34,37,38,44,55]      | 5                  | [8,9,34,37,44]   | 5              | [8,9,34,37,44]      |
| Usability Evaluation Approach (n=1) | 1             | [43]                      | 1              | [43]                      | 1              | [43]                      | 1                  | [43]             | 0              |                     |
| User Centered Design/Approach (n=9) | 9             | [12,14,29,36,39,41,52-54] | 9              | [12,14,29,36,39,41,52-54] | 9              | [12,14,29,36,39,41,52-54] | 5                  | [14,29,39,41,53] | 6              | [14,29,39,41,52,53] |
| Other (Did not Specify) (n=2)       | 2             | [28,45]                   | 2              | [28,45]                   | 1              | [45]                      | 1                  | [45]             | 1              | [45]                |
